# Supplementary material for: Mutations That Affect the Surface Expression of TRPV6 Are Associated with the Upregulation of Serine Proteases in the Placenta of an Infant
Source: MDPI journal article supplement (doi:10.3390/ijms222312694), 2021-11-24
Supplement: s1 [file s1]

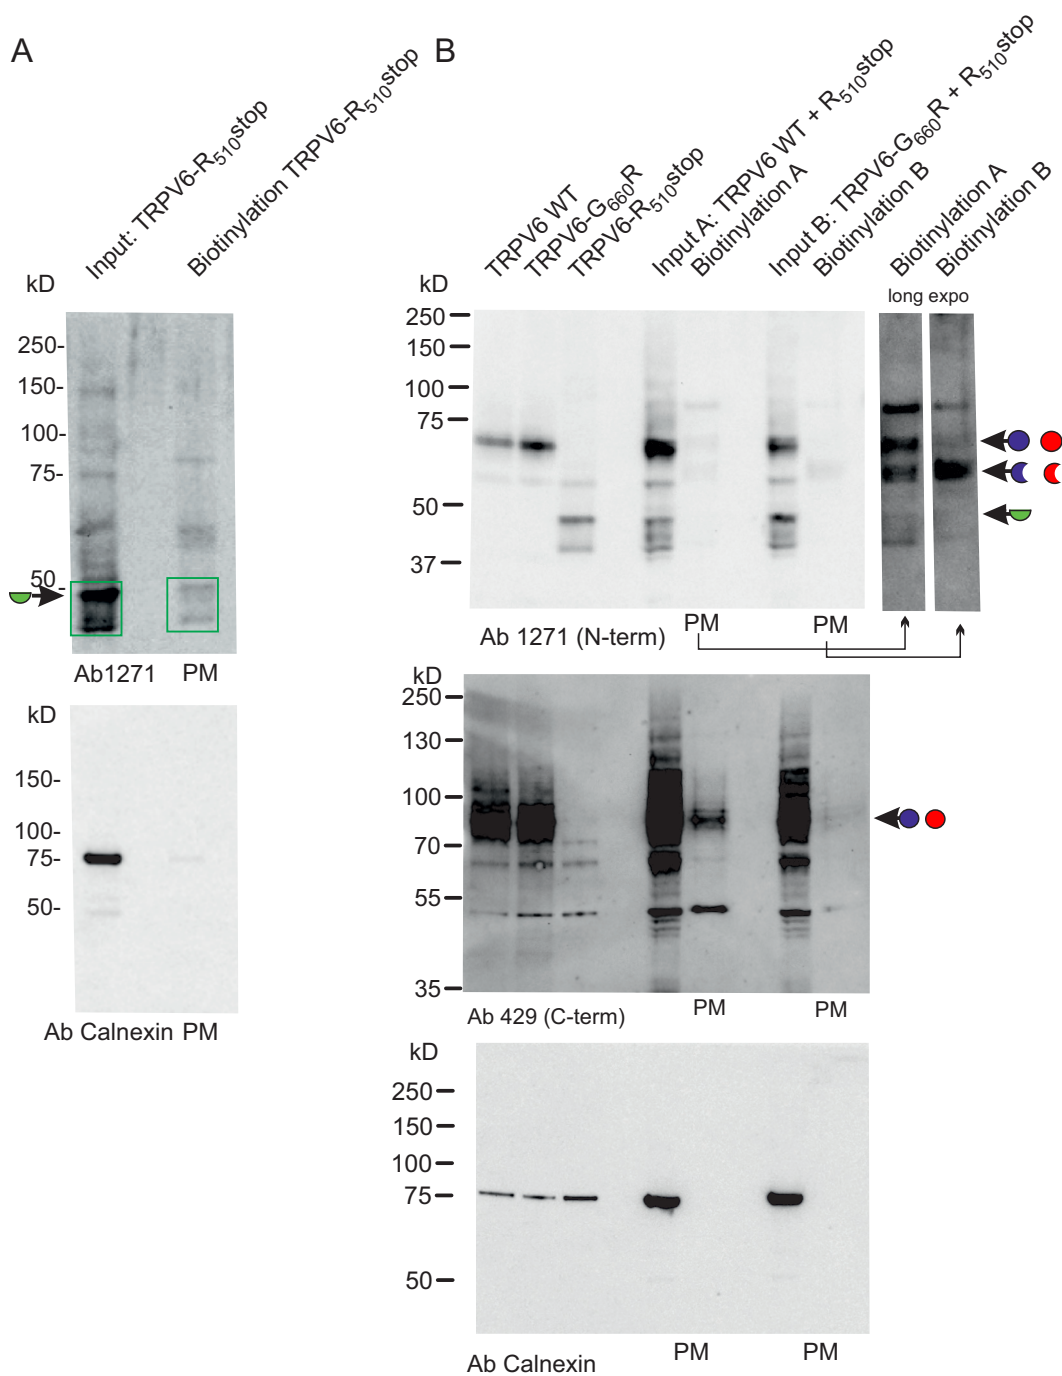

Supplementary Figure S2

A, COS cells were transfected with the truncated TRPV6 R<sub>510</sub>stop mutant; upper blot, left lane: input, right lane: eluate from avidin beads = biotinylated plasma membrane (PM) fraction incubated with TRPV6 specific ab 1271 and calnexin ab (lower blot). B, COS cells were transfected with TRPV6 WT, TRPV6-G<sub>660</sub>R or TRPV6-R<sub>510</sub>stop constructs alone or as combinations (WT + R<sub>510</sub>stop, G<sub>660</sub>R + R<sub>510</sub>stop). Blots were incubated with ab 1271 (upper), ab 429 (middle) and ab calnexin (lower) blot. Long exposure of biotinylated fractions are at the very right. Green semicircle truncated TRPV6-R<sub>510</sub>stop, blue circle TRPV6 WT and red circle TRPV6-G<sub>660</sub>R. Reduced blue and red circles indicates possible C-terminal breakdown products derived from TRPV6 WT and TRPV6-G<sub>660</sub>R, respectively.
