# Supplementary material for: Mutations That Affect the Surface Expression of TRPV6 Are Associated with the Upregulation of Serine Proteases in the Placenta of an Infant
Source: MDPI journal article supplement (doi:10.3390/ijms222312694), 2021-11-24
Supplement: s1 [file s1]

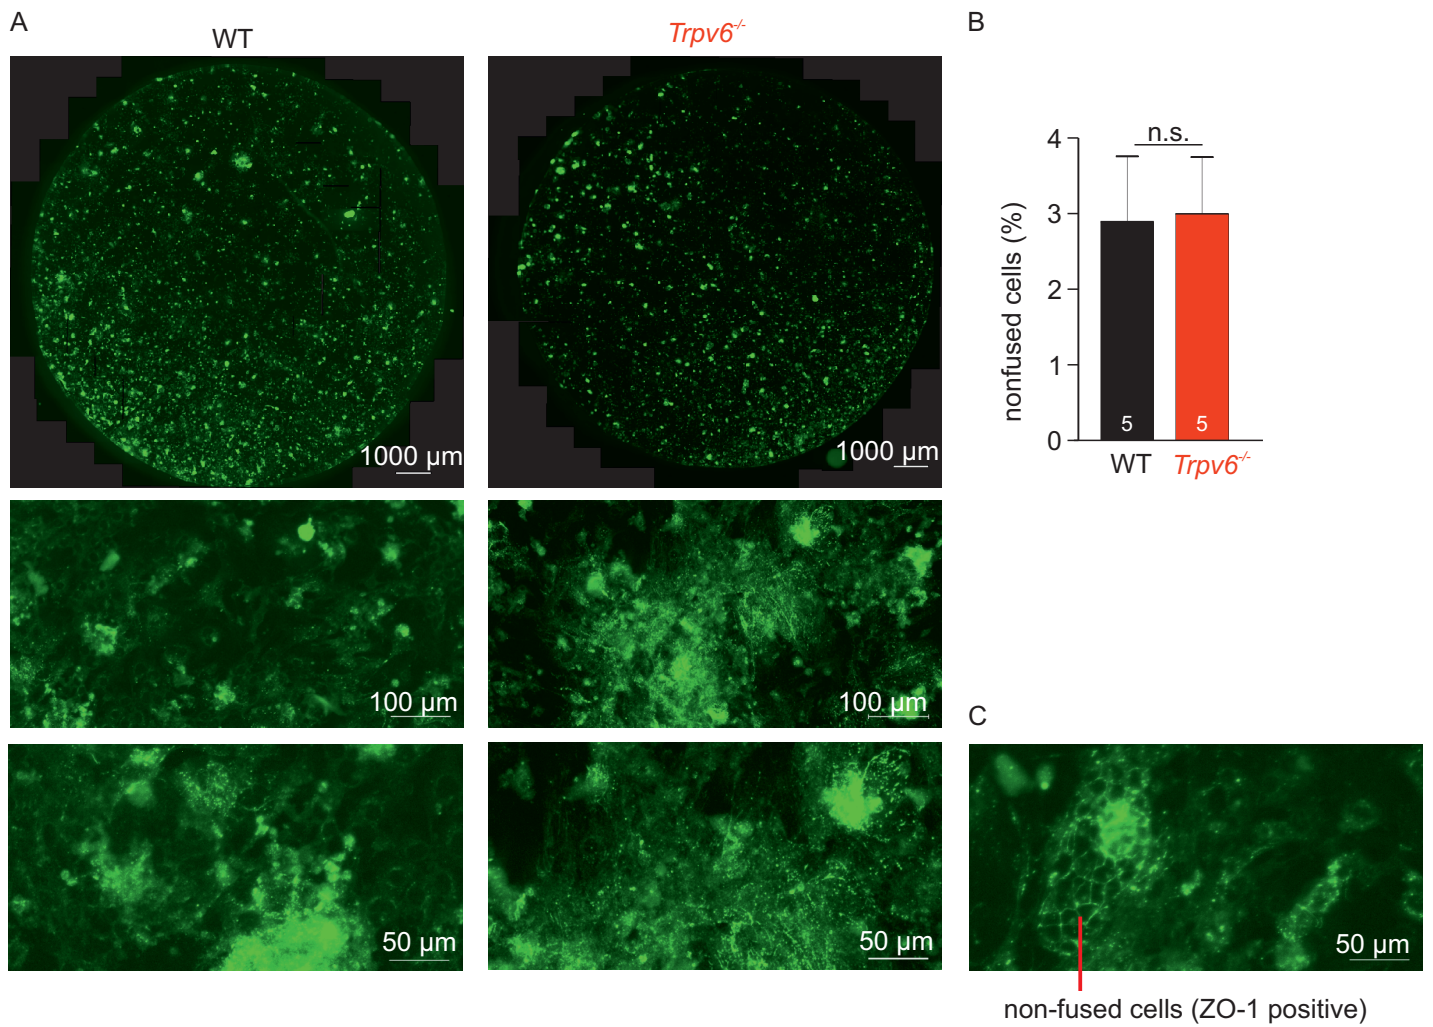

Supplementary Figure S4: Syncytialization of primary trophoblasts from WT and *Trpv6*<sup>-/-</sup> mice. A, immunostaining of trophoblasts with a ZO-1 specific antibody on coverslips and enlarged sections. B, percentage of non-fused trophoblasts (ZO-1 positive, 5 coverslips derived from 3 mice each). C, example of a region in wild type trophoblast showing non-fused cells. Student's t-test with the significance level n.s. (not significant) and results are shown as mean + SD.
