# Supplementary material for: Mutations That Affect the Surface Expression of TRPV6 Are Associated with the Upregulation of Serine Proteases in the Placenta of an Infant
Source: MDPI journal article supplement (doi:10.3390/ijms222312694), 2021-11-24
Supplement: s1 [file s1]

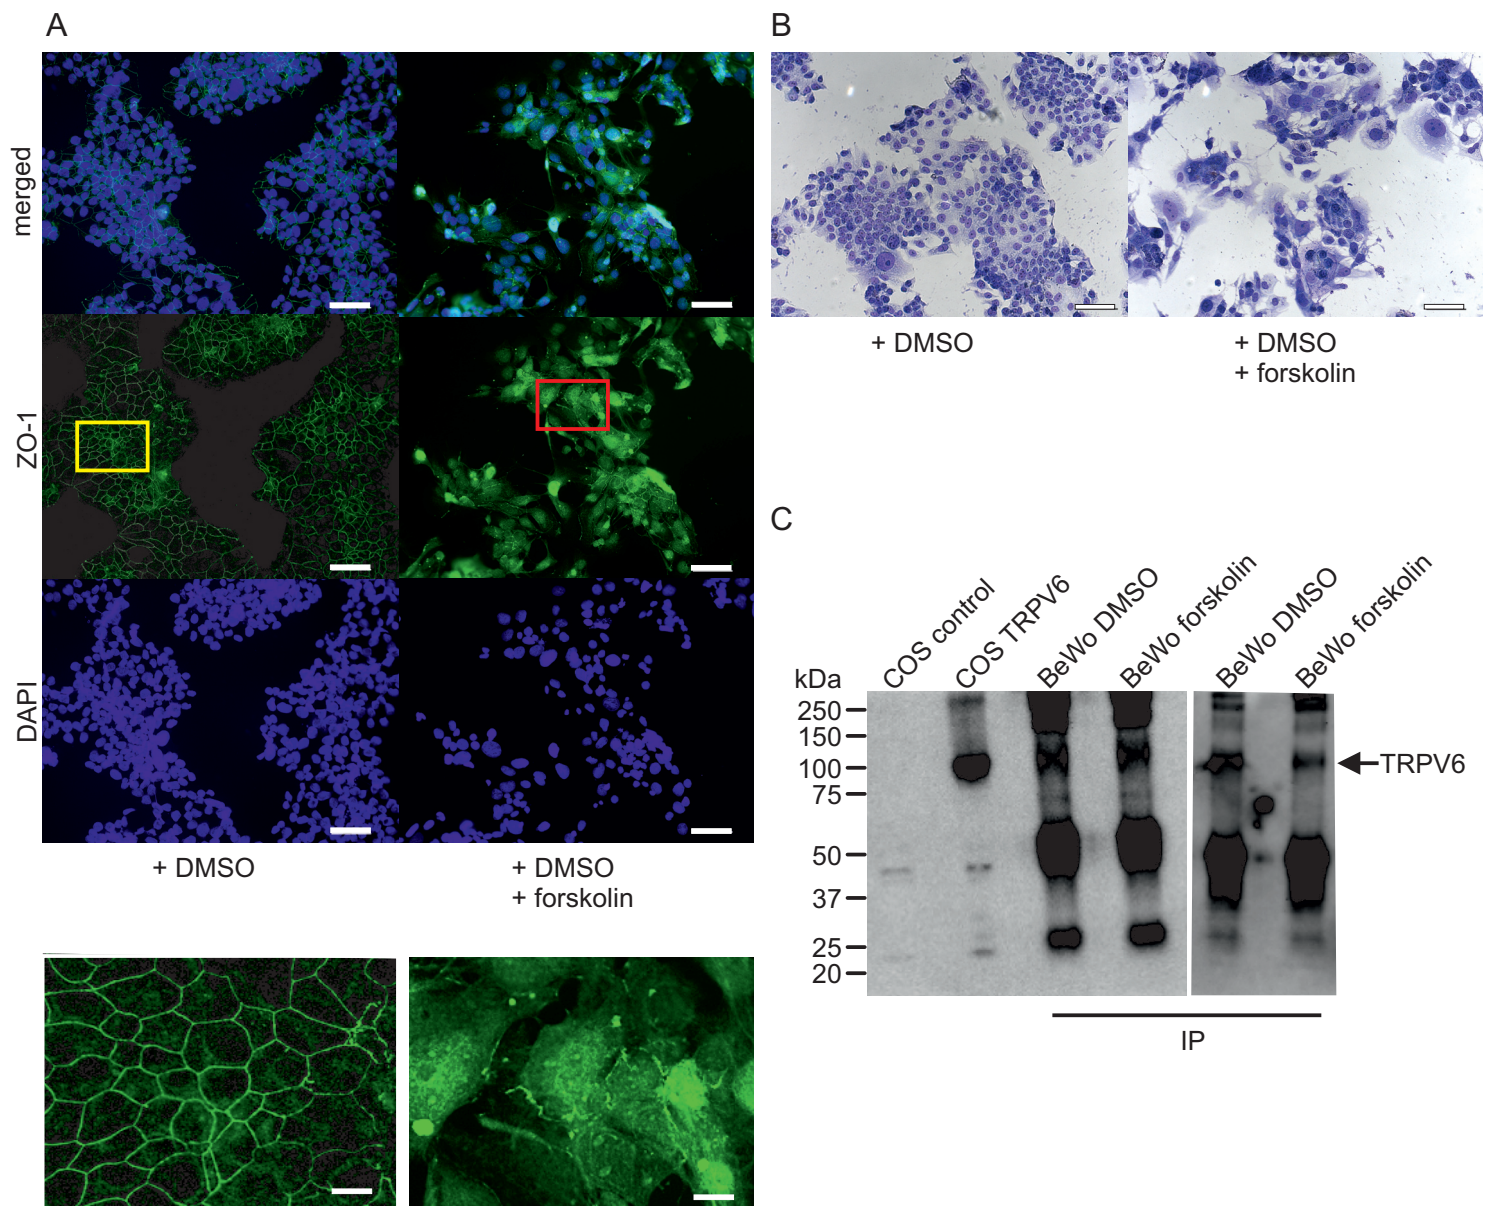

Supplementary Figure S3: Expression of TRPV6 during forskolin induced syncyalization of BeWo-cells. A, immunocytochemical staining of BeWo-cells after 48 h with and without forskolin using a zonula occludens (ZO-1) specific antibody, scale 100 $\mu$ M/20 $\mu$ M or B, with eosin-azure staining, scale 20 $\mu$ M. C, Western blot analysis of protein lysates from TRPV6-transfected COS cells (positive control), untransfected COS cells (negative control) and TRPV6 immunoprecipitations (IP) from BeWo cells treated with DMSO or with DMSO and forskolin (20 $\mu$ M). Western blots were incubated with the polyclonal TRPV6 specific antibody 429 (left) or with the monoclonal antibody 20C6 (right, (24)).
