# Supplementary material for: Mutations That Affect the Surface Expression of TRPV6 Are Associated with the Upregulation of Serine Proteases in the Placenta of an Infant
Source: MDPI journal article supplement (doi:10.3390/ijms222312694), 2021-11-24
Supplement: s1 [file s1]

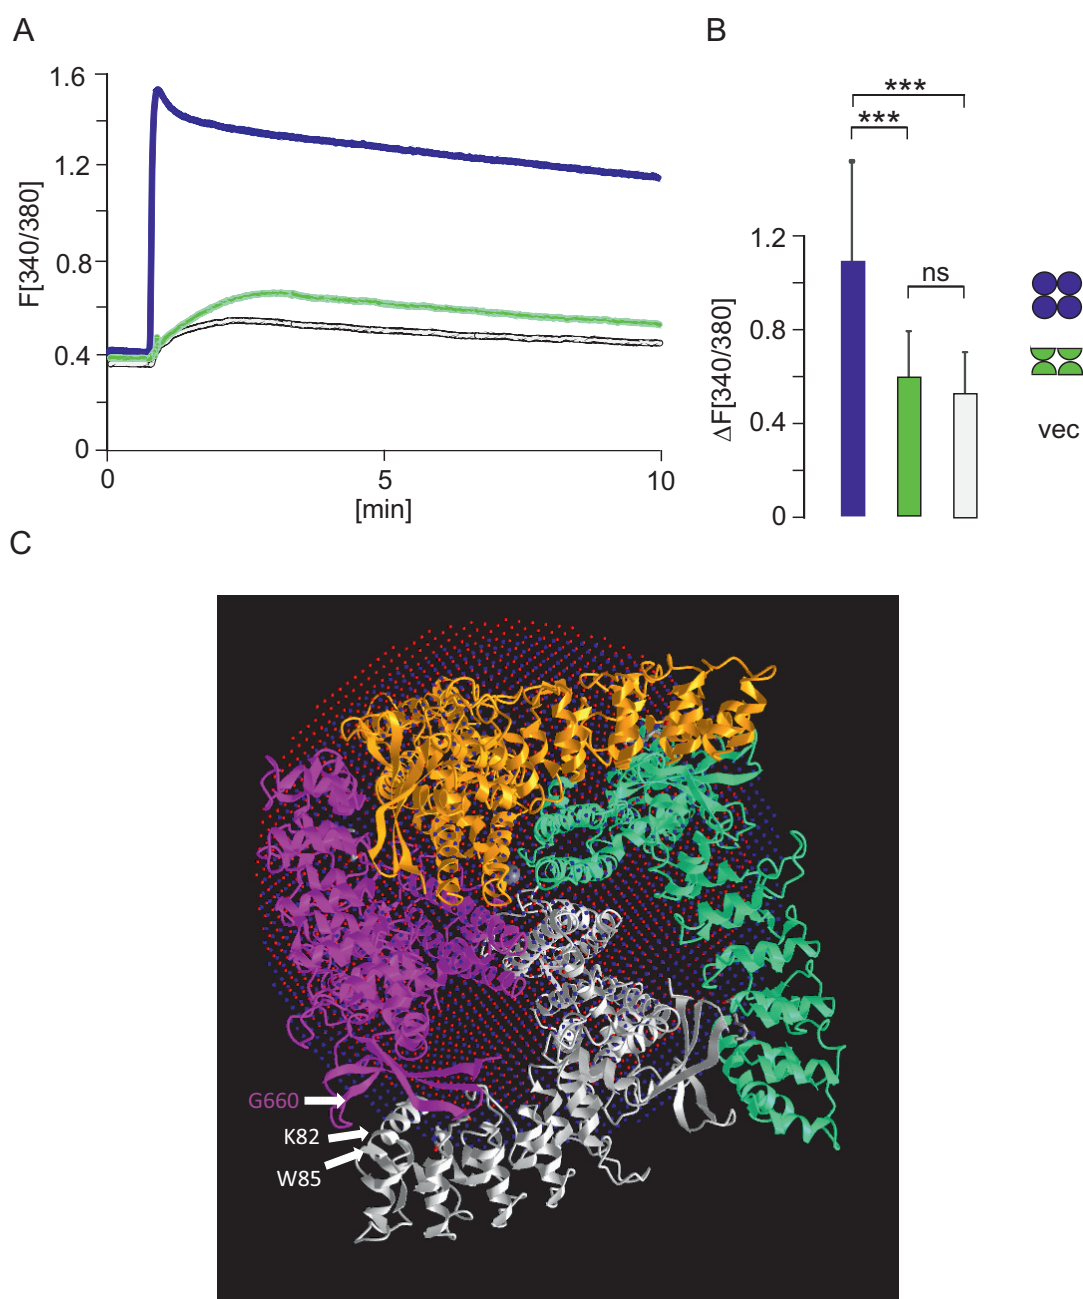

Supplementary Figure S1

A, Calcium imaging of HEK293 cells transfected with TRPV6-I-GFP (blue, n/N= 124/2), TRPV6 R<sub>510</sub>stop (green, n/N= 67/2) and I-GFP vector (white, n/N=86/2), B statistical analysis. n= number of cells, N= number of experiments. **C, Subunits of the TRPV6 channel. The position of the G<sub>660</sub> residue is indicated (pink) as well as K<sub>82</sub> and W<sub>85</sub> of the interacting subunit (grey).**
